# Supplementary material
Source: publisher figshare collection journal article supplement (https://sage.figshare.com/ndownloader/files/13438706)
Supplement: Supplementary file 1 [file 13438706]

# Supplements

## Lessons Lessoned from Multi-regional Trials with Signals of Treatment Effect Heterogeneity

### 1. Probability of observing a negative treatment difference in a subgroup

Suppose the primary variable of a trial follows a normal distribution. Assuming the common standard deviation of the treatment and control is  $\sigma$ , to detect a between-treatment difference of  $\delta$  with power,  $1-\beta$ , at the 2-sided significance level 0.05, the total sample size under 1:1 randomization is:

$$N_{\beta} = 4(1.96 + z_{\beta})^2 \left(\frac{\sigma}{\delta}\right)^2,$$

where  $z_{\beta}$  is the  $(1-\beta)$ th-quantile of the standard normal distribution.

Under the alternative, for a subgroup with a total sample size  $n$ , the chance to observe a negative result, i.e., mean difference  $<0$ , is  $\Phi\left(-\sqrt{n}\frac{\delta}{2\sigma}\right)$ , where  $\Phi$  is the cumulative distribution function of the standard normal distribution.

For a trial with a power of  $PWR = 1 - \beta$ , if the subgroup sample size is a proportion  $r$  of  $N$ , i.e.,  $n=rN_{PWR}$ , the chance to observe a negative result on this subgroup is  $\Phi\left(-\sqrt{n}\frac{\delta}{2\sigma}\right) = \Phi(-(1.96 + z_{\beta})\sqrt{r})$ . Table S1 presents the probability of observing a negative treatment difference in a subgroup of size  $n$  as a proportion of the total planned sample sizes.

**Table S1. Chance to observe a negative treatment difference in a subgroup with a sample size  $n=rN$**

|              | Power of the Trial |            |            |
|--------------|--------------------|------------|------------|
| <b>r=n/N</b> | <b>80%</b>         | <b>90%</b> | <b>95%</b> |
| 5%           | 27%                | 23%        | 21%        |
| 10%          | 19%                | 15%        | 13%        |
| 15%          | 14%                | 10%        | 8%         |
| 20%          | 11%                | 7%         | 5%         |

Suppose an MRCT involves  $K$  regions with a fraction of sample size  $r_k$  for the  $k$ th region. The probability of observing a negative result in at least one region is

$$1 - \Phi\left((1.96 + z_\beta)\sqrt{r_1}\right) \times \dots \times \Phi\left((1.96 + z_\beta)\sqrt{r_K}\right).$$

This probability is minimized when  $r_1 = \dots = r_K = \frac{1}{K}$ , i.e., the probability of observing a negative result is  $\geq 1 - \left[\Phi\left((1.96 + z_\beta)\sqrt{1/K}\right)\right]^K$ .

## 2. Ad hoc probability of observing a negative treatment difference in a subgroup

Quan, et al (2017) used an approach to calculate the ad hoc probability of observing a negative result in a subgroup based the study result. In a MRCT with  $K$  regions, suppose the sample size per treatment arm, the treatment effect estimates and their variances of region  $k$  are  $N_k$ ,  $\hat{\delta}_k$ , and  $\hat{\sigma}_k^2$ , respectively. The true overall treatment effect  $\delta$  is its estimate  $\hat{\delta}$ . The ad hoc probability of observing a negative result in a subgroup is

$$\begin{aligned} 1 - P(\hat{\delta}_1 > 0, \dots, \hat{\delta}_K > 0 | \delta) &= 1 - \prod_{k=1}^K P(\hat{\delta}_k > 0 | \delta) \\ &= 1 - \prod_{k=1}^K \Phi\left(\hat{\delta} / \sqrt{N_k \hat{\sigma}_k^2}\right). \end{aligned}$$

## 3. Formulae for conversion of summary statistics for survival data

For an event driven MRCT, let  $\lambda_1$  and  $\lambda_0$  be the true overall hazard rates of the active treatment and placebo groups. Moreover, suppose  $\lambda_{1k}$  and  $\lambda_{0k}$  are the true hazard rates,  $E_{1k}$  and  $E_{0k}$  are the expected numbers of events,  $\hat{E}_{1k}$  and  $\hat{E}_{0k}$  are the

observed numbers of events,  $U_{1k}$  and  $U_{0k}$  are the total exposures (patient-years) for the active treatment and placebo for the  $k$ th region/subgroup,  $k=1, \dots, K$ , respectively. Without data of individual patients from publications, summary statistics will be used to derive the asymptotic results. First,  $\hat{\lambda}_{ik} = \hat{E}_{ik} / U_{ik}$  is the estimate of the overall

regional hazard rate  $\lambda_{ik}$  (it can be treated as the average hazard rate if it is not constant over time). Note that  $Var(\hat{\lambda}_{ik}) = \lambda_{ik} / U_{ik}$ . Thus, based on a delta method, the estimate

of variance of  $\log(\hat{\lambda}_{ik})$  is  $\left(\frac{\hat{E}_{ik}}{U_{ik}}\right) \frac{1}{(\hat{\lambda}_{ik})^2} = \frac{1}{\hat{E}_{ik}}$ . Asymptotically (with the

expected number of events replaced by the observed number of events), the log

estimate of the hazard ratio of the active treatment versus placebo for subgroup  $k$

$$\log(\hat{\theta}_k) = \log(\hat{\lambda}_{1k} / \hat{\lambda}_{0k}) \sim N(\log(\lambda_{1k} / \lambda_{0k}), \frac{1}{\hat{E}_{1k}} + \frac{1}{\hat{E}_{0k}}). \quad (1)$$

The 95% confidence interval for  $\log(\lambda_{1k} / \lambda_{0k})$  is

$$(L_k, U_k) = (\log(\hat{\lambda}_{1k} / \hat{\lambda}_{0k}) - z_{0.975} \sqrt{1/\hat{E}_{1k} + 1/\hat{E}_{0k}}, \log(\hat{\lambda}_{1k} / \hat{\lambda}_{0k}) + z_{0.975} \sqrt{1/\hat{E}_{1k} + 1/\hat{E}_{0k}})$$

and the 95% confidence interval for hazard ratio  $\lambda_{1k} / \lambda_{0k}$  is

$$(\exp(L_k), \exp(U_k)). \quad (2)$$

We can also use (1) to derive the p-value for testing  $H_{0k} : \delta_k = \lambda_{1k} / \lambda_{0k} \geq 1$  versus

$H_{ak} : \delta_k = \lambda_{1k} / \lambda_{0k} < 1$ . Note that under  $H_{0k} : \delta_k = 1$

$$t = \log(\hat{\lambda}_{1k} / \hat{\lambda}_{0k}) / \sqrt{1/\hat{E}_{1k} + 1/\hat{E}_{0k}} \sim N(0,1).$$

Thus, the p-value is

$$\Pr(Z < t)$$

where  $Z$  is a random variable with a standard normal distribution.

The overall estimate of the log hazard rate of individual treatment group combining data across the subgroups asymptotically follows

$$\log(\hat{\lambda}_i) = \frac{\sum_{k=1}^K \hat{E}_{ik} \log(\hat{\lambda}_{ik})}{\sum_{k=1}^K \hat{E}_{ik}} \sim N\left(\frac{\sum_{k=1}^K E_{ik} \log(\lambda_{ik})}{\sum_{k=1}^K E_{ik}}, \frac{1}{\sum_{k=1}^K E_{ik}}\right) \quad (3)$$

with the proportions of the inverses of the variances as the weights. Confidence intervals for the overall hazard rates of individual treatments can be derived based on (3). If a stratified approach with the subgroup factor as a stratification factor is used for deriving the overall hazard ratio, the overall estimate of the hazard ratio as a weighted combination of the individual hazard ratios will be

$$\hat{\theta} = \frac{\sum_{k=1}^K \log(\hat{\lambda}_{1k} / \hat{\lambda}_{0k}) / \hat{\sigma}_k^2}{\sum_{k=1}^K 1 / \hat{\sigma}_k^2}$$

where  $\hat{\sigma}_k^2 = \frac{1}{\hat{E}_{1k}} + \frac{1}{\hat{E}_{0k}}$  is the estimate of the variance of the hazard ratio for the  $k$ th region/subgroup (if a publication directly provides  $\hat{\sigma}_k^2$  derived based on individual patients' data, this  $\hat{\sigma}_k^2$  should be used. If the publication provides the 95% confidence interval for  $\lambda_{1k} / \lambda_{0k}$ , via (2), we can also derive  $\hat{\sigma}_k^2$ .) Again, the proportions of the inverses of the variances are used as the weights. The asymptotic distribution for the overall estimate of the hazard ratio

$$\hat{\theta} \sim N\left(\frac{\sum_{k=1}^K \log(\lambda_{1k} / \lambda_{0k}) / \hat{\sigma}_k^2}{\sum_{k=1}^K 1 / \hat{\sigma}_k^2}, \frac{1}{\sum_{k=1}^K 1 / \hat{\sigma}_k^2}\right). \quad (4)$$

This asymptotic distribution can be used to derive the 95% confidence interval and p-value for the overall hazard ratio.

To calculate the probability of observing at least one negative regional treatment effect, we need to evaluate

$$\Pr(\log(\hat{\theta}_1) > 0, \text{ or } \dots, \log(\hat{\theta}_K) > 0 \mid \theta_1 = \dots = \theta_K = \theta) \quad (5)$$

based on the asymptotic distribution of  $\log(\hat{\theta}_k)$  (see (1)) given the true value  $\theta_k = \theta$  which can be the estimate of the overall hazard ratio of the whole MRCT. Note that  $\log(\hat{\theta}_k)$ 's are independent. Probability (5) can be easily calculated based on (1). If probability (5) is large, the chance of observing negative regional treatment effects will be large as well. Other probabilities can also be calculated.

For formal analyses performed by the study sponsor, individual patients' data should be used to derive the variances and asymptotic distributions.

#### 4. The details of the application of the drop-min approach in ISEL study

**Table S2: Survival Data from the ISEL Study**

|                                                   |       | <b>Gefitinib</b> | <b>Placebo</b> | <b>HR</b> | <b>95% CI</b> | <b>p-value</b> |
|---------------------------------------------------|-------|------------------|----------------|-----------|---------------|----------------|
| Non-Asian                                         | N     | 894              | 456            | 0.93      | 0.81, 1.08    | 0.364          |
|                                                   | Death | 536              | 269            |           |               |                |
| Asian                                             | N     | 235              | 107            | 0.66      | 0.48, 0.91    | 0.011          |
|                                                   | Death | 98               | 75             |           |               |                |
| Sources: Carroll (2004) and Thatcher, et al 2005. |       |                  |                |           |               |                |

**Table S3: Simulated Bias and Adjusted Test Statistic for Asian Patient Survival Data from the ISEL Study**

(For Asian origin patients,  $\ln(\text{HR}) = -0.416$ ,  $\text{SD of } \ln(\text{HR}) = 0.163$ ,  $p = 0.011$ )

|      | <b>Bias</b> | <b>SD of bias</b> | <b>Adjusted <math>\ln(\text{HR})</math></b> | <b>Adjusted HR</b> | <b>Adjusted z-value</b> | <b>Adjusted p-value</b> |
|------|-------------|-------------------|---------------------------------------------|--------------------|-------------------------|-------------------------|
| FEM  | -0.102      | 0.149             | -0.314                                      | 0.73               | -2.110                  | 0.035                   |
| DREM | -0.010      | 0.154             | -0.406                                      | 0.67               | -2.637                  | 0.008                   |

## 5. The details of the application of the drop-min approach in BiDiI example

**Table S4: Survival Data from the V-HeFT I Study**

|                                                                                                                                                                       |       | <b>BiDiI</b> | <b>Placebo</b> | <b>p-value</b> | <b>HR</b> | <b>ln(HR)</b> | <b>SD of ln(HR)</b> |
|-----------------------------------------------------------------------------------------------------------------------------------------------------------------------|-------|--------------|----------------|----------------|-----------|---------------|---------------------|
| White                                                                                                                                                                 | N     | 132          | 192            | 0.48           | 0.8855    | -0.1216       | 0.1721              |
|                                                                                                                                                                       | Death | 56           | 85             |                |           |               |                     |
| Black                                                                                                                                                                 | N     | 49           | 79             | 0.041          | 0.5322    | -0.6306       | 0.3086              |
|                                                                                                                                                                       | Death | 15           | 35             |                |           |               |                     |
| Overall                                                                                                                                                               | N     | 186          | 183            | 0.093          | 0.7785    | -0.2504       | 0.1491              |
|                                                                                                                                                                       | Death | 72           | 120            |                |           |               |                     |
| N, number of death, and log-rank p-value were from Carlson, et al (1999); ln(HR), HR, and SD of ln(HR) were calculated from formulas in section 3 of this Supplement. |       |              |                |                |           |               |                     |

**Table S5: Simulated Bias and Adjusted Test Statistics for Black Patient Survival Data from the V-HeFT I Study**

(For black patients,  $\ln(\text{HR}) = -0.6306$ ,  $\text{SD of } \ln(\text{HR}) = 0.3086$ )

|      | <b>Bias</b> | <b>SD of bias</b> | <b>Adjusted ln(HR)</b> | <b>Adjusted HR</b> | <b>Adjusted z-value</b> | <b>Adjusted p-value</b> |
|------|-------------|-------------------|------------------------|--------------------|-------------------------|-------------------------|
| FEM  | -0.141      | 0.206             | -0.490                 | 0.61               | -2.373                  | 0.018                   |
| DREM | -0.042      | 0.279             | -0.589                 | 0.55               | -2.114                  | 0.035                   |

**Table S6: Survival Data from the Studies V-HeFT I and II Combined**

|                                                                                                                                                                                                                                                        |       | <b>BiDiL<br/>V-HeFT I-II<br/>combined</b> | <b>Placebo<br/>V-HeFT I</b> | <b>HR</b> | <b>ln(HR)</b> | <b>SD of<br/>ln(HR)</b> | <b>p-value</b> |
|--------------------------------------------------------------------------------------------------------------------------------------------------------------------------------------------------------------------------------------------------------|-------|-------------------------------------------|-----------------------------|-----------|---------------|-------------------------|----------------|
| White                                                                                                                                                                                                                                                  | N     | 414                                       | 192                         | 0.83      | -0.1922       | 0.1331                  | 0.1496         |
|                                                                                                                                                                                                                                                        | Death | 168                                       | 85                          |           |               |                         |                |
|                                                                                                                                                                                                                                                        | AMR   | 15.5%                                     | 18.8%                       |           |               |                         |                |
| Black                                                                                                                                                                                                                                                  | N     | 158                                       | 79                          | 0.62      | -0.4712       | 0.2170                  | 0.030          |
|                                                                                                                                                                                                                                                        | Death | 54                                        | 35                          |           |               |                         |                |
|                                                                                                                                                                                                                                                        | AMR   | 10.8%                                     | 17.3%                       |           |               |                         |                |
| <p>N, number of death, and AMR (i.e., Annual Mortality Rate) were from Carlson, et al (1999);</p> <p>HR is estimated as the ratio of AMR;</p> <p>ln(HR), SD of ln(HR), and p-value were calculated from formulas in Supplement of this manuscript.</p> |       |                                           |                             |           |               |                         |                |

**Table S7: Simulated bias and adjusted test statistic for black patients' survival data from the V-HeFT I & II Combined**

(For black patients,  $\ln(\text{HR}) = -0.4712$ ,  $\text{SD of } \ln(\text{HR}) = 0.2170$ ,  $p = 0.030$ )

|      | <b>Bias</b> | <b>SD<br/>of bias</b> | <b>Adjusted<br/>ln(HR)</b> | <b>Adjusted<br/>HR</b> | <b>Adjusted<br/>z-value</b> | <b>Adjusted<br/>p-value</b> |
|------|-------------|-----------------------|----------------------------|------------------------|-----------------------------|-----------------------------|
| FEM  | -0.102      | 0.149                 | -0.370                     | 0.69                   | -2.486                      | 0.013                       |
| DREM | -0.047      | 0.188                 | -0.424                     | 0.65                   | -2.255                      | 0.024                       |
